# Supplementary material for: Predictors of help-seeking behaviour in people with mental health problems: a 3-year prospective community study
Source: PubMed Central journal article supplement (PMC8414662; doi:10.1186/s12888-021-03435-4), 2021-09-03
Supplement: 12888_2021_3435_MOESM2_ESM.pdf [file 12888_2021_3435_MOESM2_ESM.pdf]

**Additional information file**  
**for**  
**Predictors of help-seeking behaviour in people with mental health problems: a 3-year prospective**  
**community study**

**Carolin M. Doll<sup>1,2</sup>, Chantal Michel<sup>3</sup>, Marlene Rosen<sup>2</sup>, Naweed Osmann<sup>1</sup>, Benno G. Schimmelmann<sup>3,4</sup>,  
Frauke Schultze-Lutter<sup>1,3,5</sup>**

*1 Department of Psychiatry and Psychotherapy, Medical Faculty, Heinrich-Heine-University, Düsseldorf, Germany. Electronic address: carolin.doll@uk-koeln.de*

*2 Department of Psychiatry and Psychotherapy, Faculty of Medicine and University Hospital Cologne, University of Cologne, Cologne, Germany.*

*3 University Hospital of Child and Adolescent Psychiatry and Psychotherapy, University of Bern, Bern, Switzerland.*

*4 University Hospital of Child and Adolescent Psychiatry, University Hospital Hamburg-Eppendorf, Hamburg, Germany.*

*5 Department of Psychology and Mental Health, Faculty of Psychology, Airlangga University, Surabaya, Indonesia*

**Correspondence author:**

Carolin Doll, M.Sc.

Department of Psychiatry and Psychotherapy

Faculty of Heinrich-Heine University and LVR clinic Düsseldorf

Bergische Landstr. 2, 40629 Düsseldorf

Email: carolin.doll@uk-koeln.de, phone: +49221 478 7225

ORCID: <https://orcid.org/0000-0002-4267-1668>

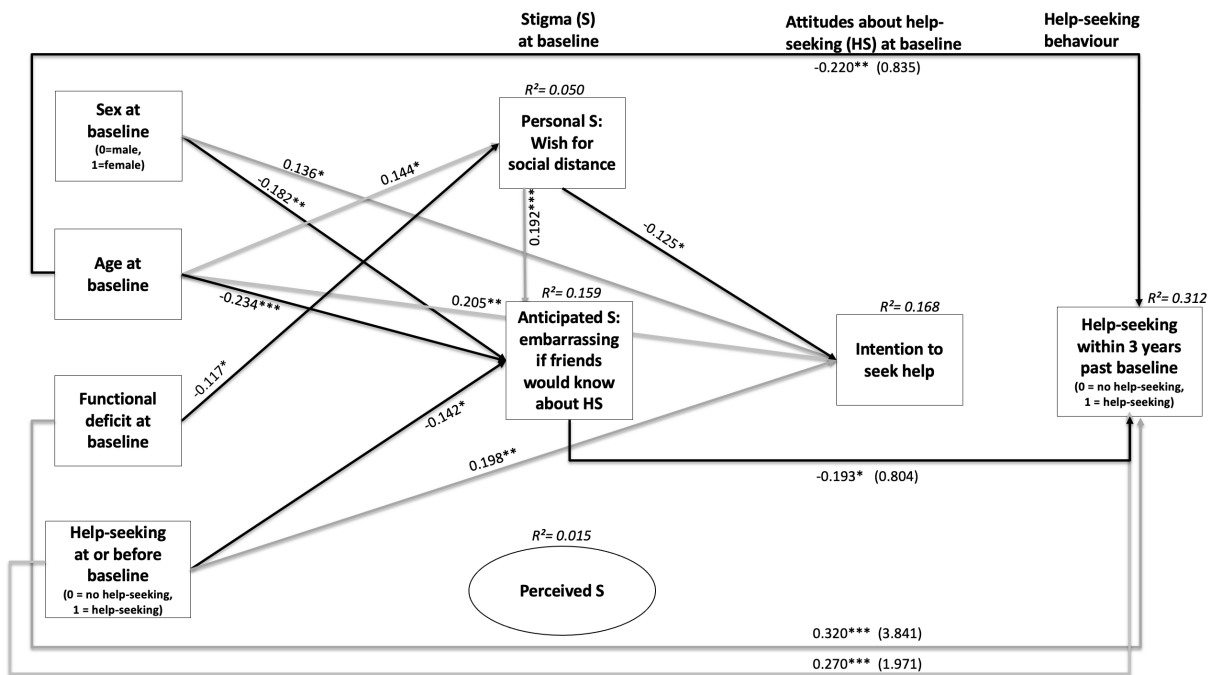

**eFig. 2.**

Final model of only significant associations between stigma, assumptions about help-seeking and healthcare utilization with standardized path coefficients (N=307).

Model fit indices:  $\chi^2_{(27)}=32.174$  with  $p=0.226$ , CFI=0.985; SRMR=0.047; RMSEA=0.025 (90% CIs=0.000, 0.054).

\* $p \leq 0.05$ ; \*\* $p \leq 0.01$ ; \*\*\* $p \leq 0.001$ ; explained variance ( $R^2$ ) for each endogenous variable in italics. In brackets, Odds Ratios for the endogenous variable “help-seeking within 3 years past baseline” are provided. Manifest variables are represented in rectangles, latent ones in ovals. Solid lines indicate significant paths, dashed lines indicate non-significant paths; in doing so, grey indicates positive, black negative correlations.
